# Supplementary material
Source: MDPI journal article supplement (https://www.mdpi.com/2072-4292/12/20/3299)
Supplement: s1 [file s1]

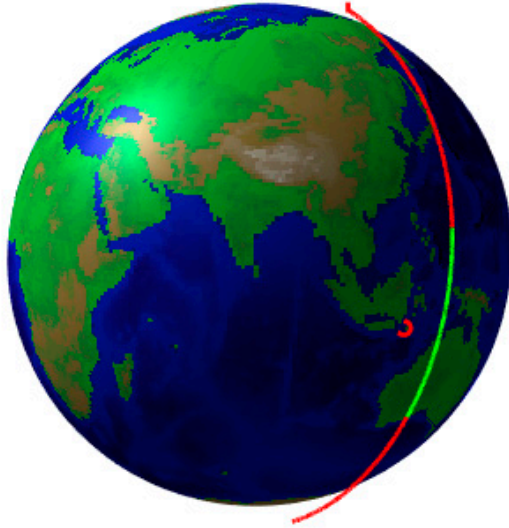

**Figure S1.** 5 August 2018 CSES satellite orbit (red line). Green line is the partial dataset analyzed. Red circle is the earthquake epicenter location.

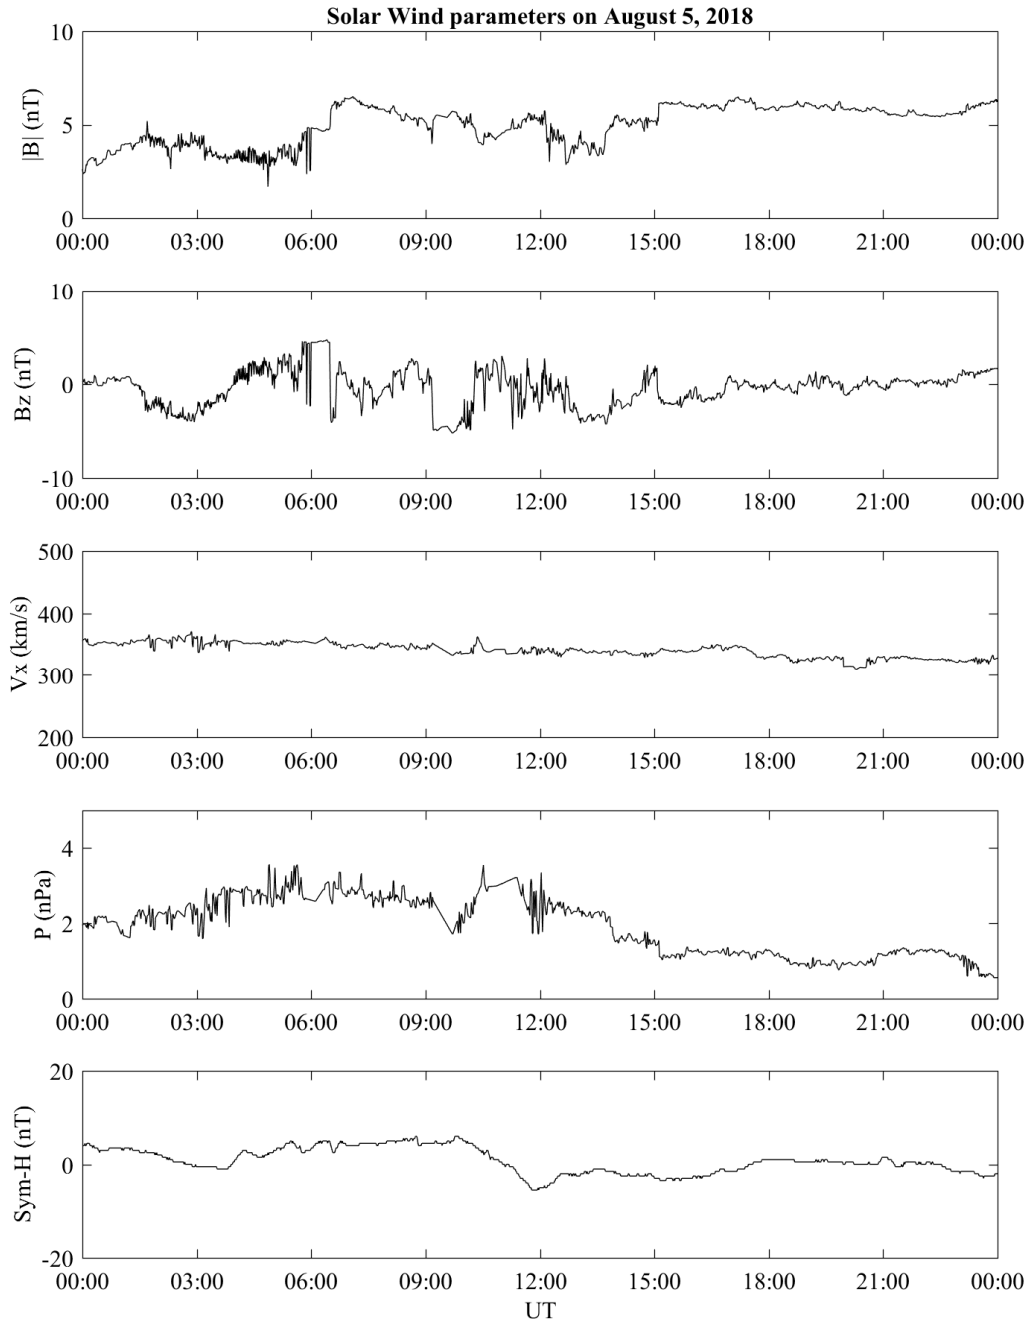

**Figure S2.** Solar Wind parameters on 5 August 2018. From the top to the bottom: Interplanetary magnetic field; North-South component of the Interplanetary magnetic field; Solar Wind speed; Solar wind plasma pressure; Sym-H index.

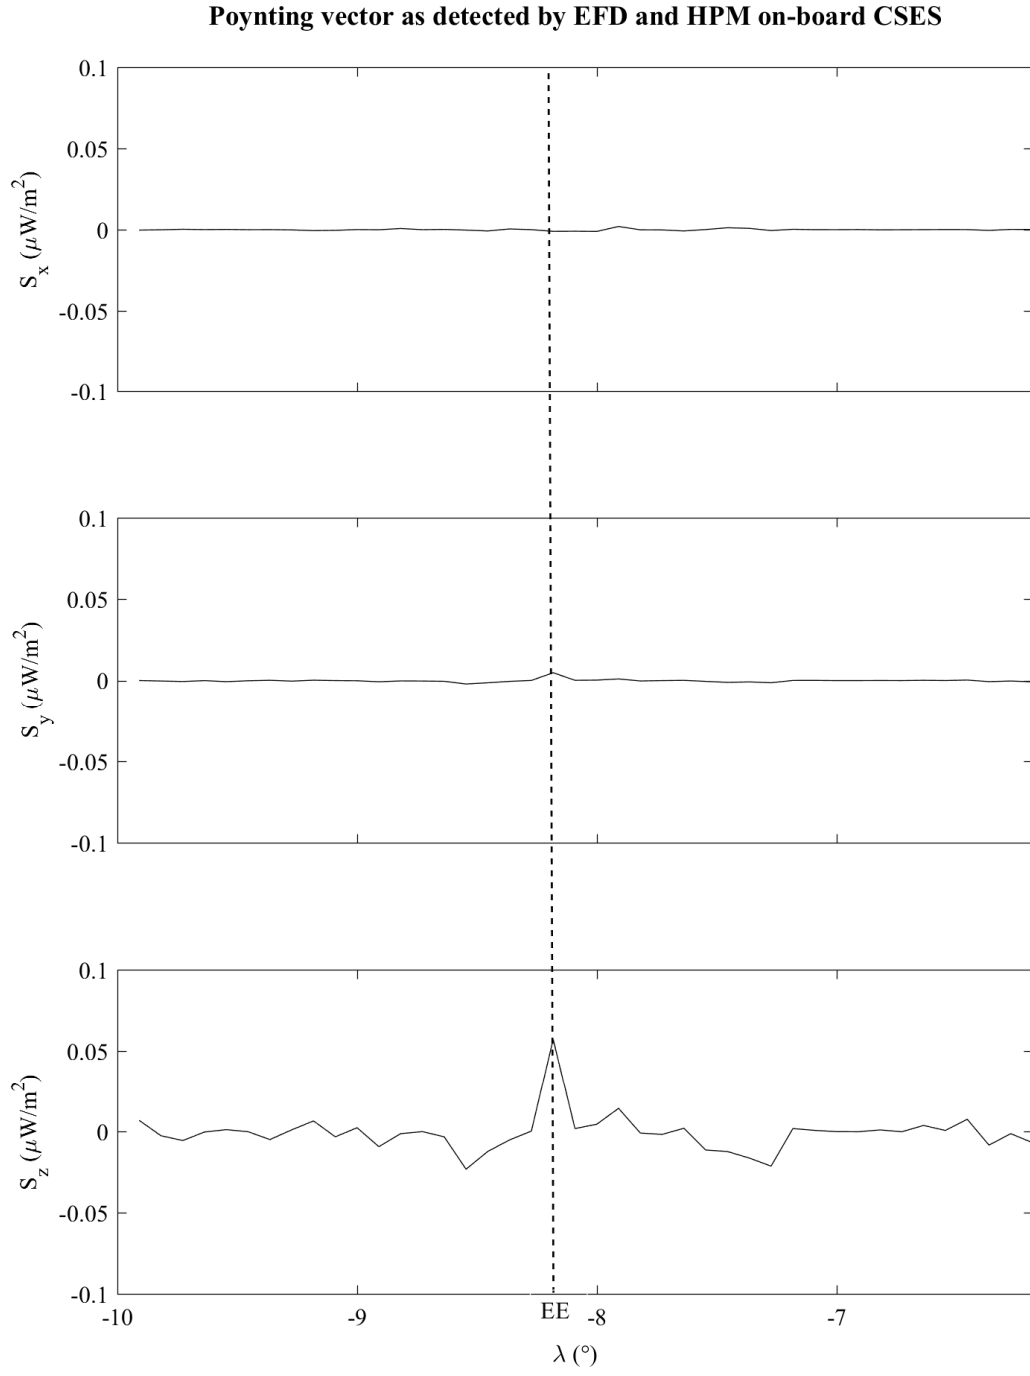

**Figure S3.** Poynting Flux as a function of latitude, as determined by EFD and HPM on-board CSES. satellite along geographical directions. The vertical dashed line represents the earthquake epicenter location.
